# Supplementary material for: Degradation of Lignin by Infrared Free Electron Laser
Source: MDPI journal article supplement (doi:10.3390/polym14122401), 2022-06-14
Supplement: s1 [file s1]

**Supporting Information**  
**for**  
**Degradation of Lignin by Infrared Free Electron Laser**

Takayasu Kawasaki<sup>1\*</sup>, Heishun Zen<sup>2</sup>, Takeshi Sakai<sup>3</sup>, Yoske Sumitomo<sup>4</sup>, Kyoko Nogami<sup>3</sup>, Ken Hayakawa<sup>3</sup>, Toyonari Yaji<sup>5</sup>, Toshiaki Ohta<sup>5</sup>, Takashi Nagata<sup>2</sup>, and Yasushi Hayakawa<sup>3</sup>

<sup>1</sup>Accelerator Laboratory, High Energy Accelerator Research Organization, 1-1 Oho, Tsukuba, Ibaraki 305-0801, Japan.

<sup>2</sup>Institute of Advanced Energy, Kyoto University, Gokasho, Uji, Kyoto 611-0011, Japan.

<sup>3</sup>Laboratory for Electron Beam Research and Application (LEBRA), Institute of Quantum Science, Nihon University, 7-24-1 Narashinodai, Funabashi, Chiba 274-8501, Japan.

<sup>4</sup>Department of Physics, College of Science and Technology, Nihon University, 1-8-14 Kanda Surugadai, Chiyoda-ku, Tokyo 101-8308, Japan.

<sup>5</sup>SR Center, Research Organization of Science and Technology, Ritsumeikan University, 1-1-1 Noji-Higashi, Kusatsu, Shiga 525-8577, Japan.

Correspondence: takayasu.kawasaki@kek.jp

## 1. IR-FEL spectra at several wavelengths.

IR-FEL spectra tuned to 6.3  $\mu\text{m}$ , 7.1  $\mu\text{m}$ , and 3.0  $\mu\text{m}$  were shown in **Fig. S1**. Each spectrum was obtained by introducing the beam line into the spectrometer. Two mid-infrared FEL spectra at 6.3  $\mu\text{m}$  and 7.1  $\mu\text{m}$  were measured at KU-FEL (Kyoto University), and one near-infrared FEL spectrum at 3.0  $\mu\text{m}$  was measured at LEBRA (Nihon University).

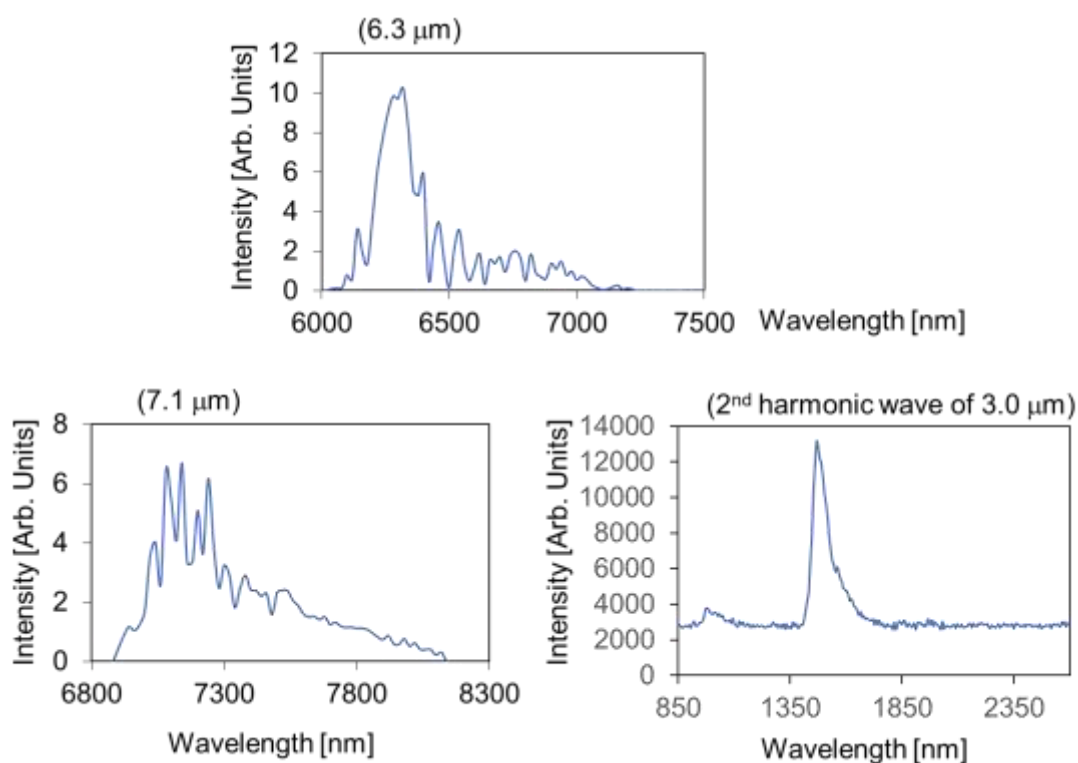

**Figure S1.** FEL spectrum at 3.0-7.1  $\mu\text{m}$ . The near-IR FEL spectrum was measured as a 2<sup>nd</sup> harmonic wave (1475 nm).

## 2. Laser irradiation method

The laser beam was introduced from a beam port to the sample surface by using two reflection mirrors and one parabolic mirror in the case of mid-IR FEL system (**Fig. S2**, upper).

In the case of near-IR FEL system (below), the beam direction was controlled by using three reflection mirrors and introduced onto the sample by using a focused lens ( $\text{CaF}_2$ ,  $f = 100$

mm, diameter: 50 2

mm). The lignin powder (about 5 mg) was added in a glass tube, and the IR-FEL was irradiated from the vertical direction at room temperature under atmospheric conditions. The glass tube was sometimes shaken horizontally to give the radiation energy to the whole sample uniformly.

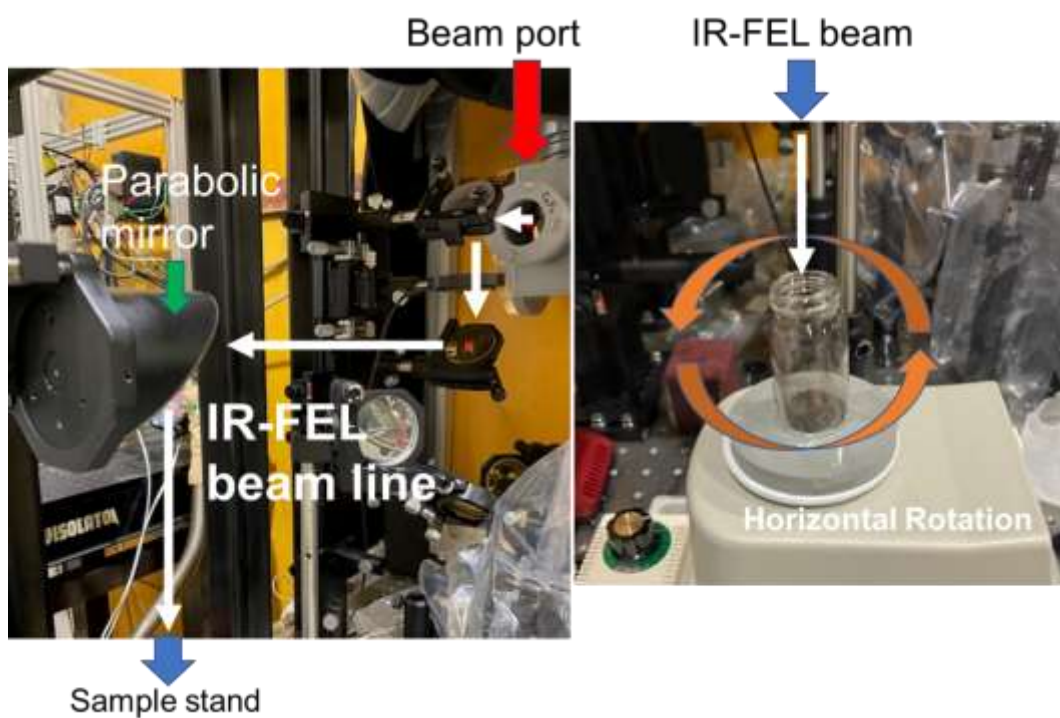

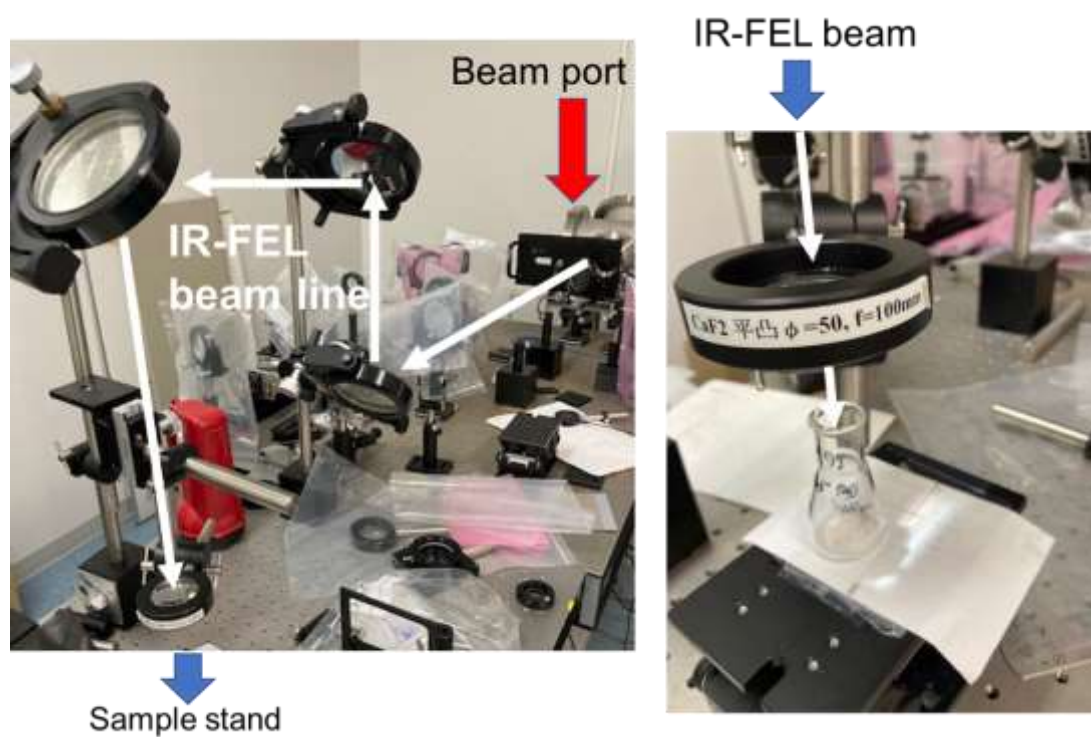

**Figure S2.** Experimental setup. Upper: mid-IR FEL irradiation system; below: near-IR FEL irradiation system.
